# Supplementary material for: The dissemination of the “Shell sentence” and compliance with the Paris Agreement
Source: Research Square preprint supplement (doi:10.21203/rs.3.rs-910470/v1), 2021-09-29
Supplement: Supplementary file 1 [file 2ffa245d989b0ee7493d71d6.docx]

**Supplementary Information**

**The dissemination of the “Shell sentence” and compliance with the Paris Agreement**

López, Luis-Antonio*1; Arce, Guadalupe2; Cadarso, María-Ángeles1; Ortiz, Mateo1; Zafrilla, Jorge1

*1Faculty of Economics and Business, University of Castilla-La Mancha, Albacete, Spain.*

2*Instituto Complutense de Estudios Internacionales, Complutense University of Madrid, Madrid, Spain*

**Corresponding author:* [*Luis.Lsantiago@uclm.es*](mailto:Luis.Lsantiago@uclm.es)

**Contents**

1. **Supplementary Methods**
2. **Data Sources**
   1. **IO Framework**
   2. **CO2 Emissions data**
   3. **Scenarios**
3. **Supplementary Methods**

Environmental extended MRIO (EEMRIO) models are widely used to estimate the carbon footprints or consumption-based accounting of different economic activities1. This method involves allocating emissions responsibility to final consumption (whether a country, a region, a sector, a city, or a final consumer) regardless of where they are produced. However, when firm heterogeneity is introduced in an MRIO model, there are different options to measure responsibility. It depends on whether we try to measure only direct carbon emissions or we also try to include the emissions embodied in inputs required to produce goods and services sold to the final or the intermediate demand.

The three main measures of emissions responsibility of multinational enterprises’ foreign affiliates (MNE) considered in this paper are: a) the direct emissions of MNE by country or production-based accounting (PBA)2; b) the producer footprint accounting (PF) of MNE by country2; and c) the extended carbon footprint of the MNE hosted by country3.

Direct emissions or PBA includes only the emissions that MNE directly produces due to their activity within a territory. Meanwhile, producer footprint accounting2, 4 considers the emissions emitted in country *r* that are incorporated in the finished goods produced within the boundaries of country *s* and allocates those emissions to country *s*, regardless of whether those goods are subsequently exported or domestically consumed.

The general equation for estimating CO2 emissions, both under the PBA and PF approaches using the AMNE tables, is:

eq. 1

where the dimensions of all matrices are (x, as they include industries, countries, and 2 firm types- domestic-owned (D) and foreign-owned (F)-; is the diagonalized vector of CO2 emissions coefficients (emissions per monetary unit of output) for every sector, region, and firm type; is the *Leontief inverse matrix* of the direct and indirect requirements for inputs per unit of production. is the diagonalized final demand matrix, obtained diagonalizing the row sum of Y matrix () and each element of the main diagonal represent total final production by firm type in industry of country (; , with no distinction of the countries that ultimately consume that production.

Matrix in equation (1) captures the economic interconnections among CO2 emission flows across industries, countries, and firm types.

Adding matrix ’s elements along columns corresponding to firm type results in the PF emissions of MNE by host country , as follows:

eq. 2

On the other hand, adding matrix ’s elements along rows corresponding to firm type results in the direct emissions or PBA responsibility of MNE by host country :

eq. 3

with and .

Although these measures are complementary, none of them fully measures the responsibility of MNE. On the one hand, PF does not consider the direct emissions of MNE that produce intermediate inputs used by domestic companies in the production of final products. On the other hand, MNE’s PBA does not include the upstream emissions embodied in MNE’s supply chains.

The sum of the emissions under the PBA and the PF would result in a double-counting emissions problem since part of the direct emissions are already included in the PF accounting (for instance, those derived from the self-consumption of inputs). Although this double counting could benefit from being more ambitious when setting mitigation targets5, it could generate problems in acquiring commitments by companies if they are considered unfairly treated.

Zhang et al.3 propose a method for calculating the extended carbon footprint of MNE which allows to consider direct and indirect emissions embodied in the entire supply chains of MNE (solving the problem of double counting of emissions) and not necessarily directly related to the final production stages, as in the PF accounting. Table S1 shows the similarities and differences between the three MNE emissions accounting criteria used in this study.

**Table S1. Differences and similarities between the PBA, PF and Zhang et al. approaches for estimating MNE carbon emissions.**

|  |  | **Emissions accounted** | | **Charges responsibility to MNE producing…** | |
| --- | --- | --- | --- | --- | --- |
| **Emissions accounting approach** | **Acronym** | **Emissions in supply chains** | **Direct emissions** | **Intermediate products** | **Final products** |
| **Production-based accounting** | PBA |  | + | + | + |
| **Producer footprint** | PF | + | + |  | + |
| **Extended carbon footprint (Zhang et al.**3**)** | ECF | + | + | + | + |

*Source: Authors own elaboration*

The extended carbon footprint of the MNE quantifies the direct emissions of MNE hosted by a given country (CO2 emissions released in the production of both intermediate and final goods) plus emissions incorporated throughout all the global value chain of MNE’s intermediate and final production.

Therefore, we calculate the extended carbon footprint of the MNE hosted by country () following Zhang et al.3 as showed in equation 4:

eq. 4

Where term is the diagonalized matrix of carbon intensity (emissions per monetary unit of output) for every sector, region, and firm type. Matrix is defined as the gross output of each sector required to produce per unit of output of the MNE hosted by country *r* and is calculated as and matrix as the output of the MNE in country *r*, calculated as .

represents the intermediate demand ratio matrix of products from MNE in country . is defined as the output of MNE in country that are used as intermediate inputs and as the final demand diagonal matrix of products from MNE in country ().

Although equations 2 and 4 are used in this study to estimate the carbon footprints of MNE by host country using PF and Zhang et al.3 approaches, respectively, matrices and in those expressions allow to identify the countries where MNE-related emissions are directly released. In fact, the results displayed on Figs. 1 and 2 in the main manuscript are presented under this perspective to identify the influence of MNE on the reduction targets of countries’ direct emissions. Using matrix , we compute the direct emissions in country related to MNE’s PF by summing the row elements of both firm types ( and ) in country that cross the columns corresponding to foreign-owned firms () hosted by every country, as follows:

eq. 5

with and . Taking India as an example, accounts for all the CO2 emissions directly released in India that are embodied in the global PF of all the MNE around the world. Eq. 5 is used for the emissions distribution between high-income countries and low- and middle-income countries shown in scenario 2 of Fig.1 in the main manuscript.

Similarly, we can estimate the direct emissions in country related to MNE’s extended carbon footprint (ECF) using matrix by summing the row elements of country across the matrices resulting from the iterations of eq.4, as follows:

eq. 6

with and . Thus, accounts for all the CO2 emissions directly released in India that are embodied in the extended carbon footprint of all the MNE around the world. Results displayed in Fig. 2 in the main manuscript are estimated using eq.6. It is also used for the emissions distribution between high-income countries and low- and middle-income countries shown in scenario 3 of Fig.1.

1. **Data Sources.**
   1. **IO Framework**

The empirical application of this paper combines information from different sources. Regarding the input-output framework, we employed the last update of ICIO tables, distinguishing firm ownership, the Analytical Activities of Multinational Enterprises (AMNE) database of OECD6, 7. This database provides symmetric MRIO tables in basic prices for the period 2005-2016 in millions of USD, 60 countries/regions, 34 industries, and 2 types of company ownership, distinguishing between production by foreign-owned and domestic-owned firms. AMNE database defines multinational enterprises’ foreign affiliates as those firms in which more than 50% of the voting power or the shares is controlled directly or indirectly by a foreign company. The structure is detailed in Figure S1.

**Figure S1. Structure of the MRIO tables from the AMNE database distinguishing between domestic- and foreign-owned production.**


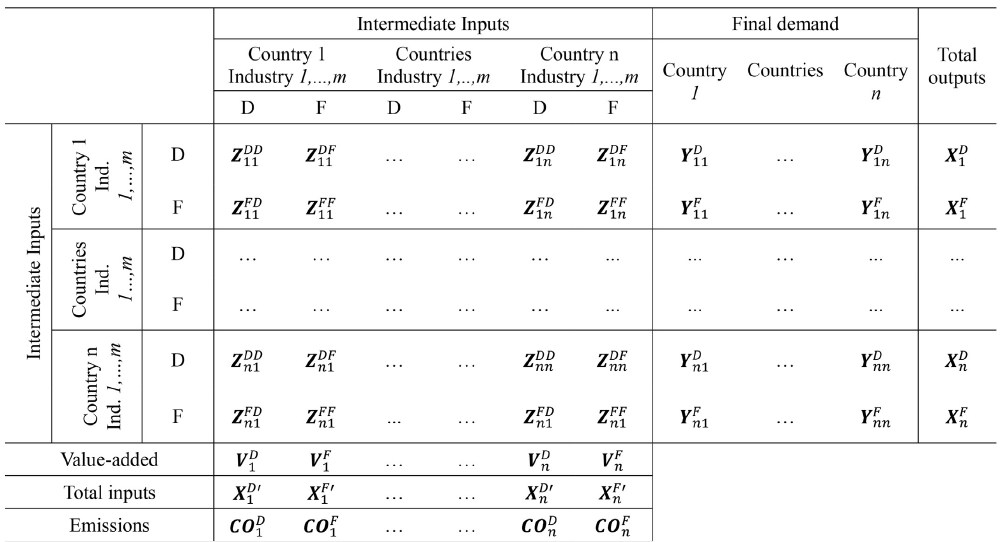


*Source: Duan et al.8.*

In addition, AMNE database provides detailed information about MNE’s global output by industry, host country, and origin country. This gives valuable insights into the global activities of MNE originated in a specific country. For instance, the foreign affiliates of multinationals from the United States produce 23% of the global output of all foreign affiliates around the world. That share rises to 91% when considering the MNE from all high-income countries.

The regional classification of AMNE used in this study is shown in Tables S3 along with the classification of countries by income level according to the World Bank9. AMNE regional classification includes 59 individual countries/regions and an aggregate for the rest of the world that contains the input-output data of all the remaining countries of the world. Table S4 presents the industries' classification of AMNE.

**Table S2. List of regions**

| **ISO** | **Country/Region** | **Income level** |  |  | **ISO** | **Country/Region** | **Income level** |
| --- | --- | --- | --- | --- | --- | --- | --- |
| 1 | AUS | Australia | High | 31 | ESP | Spain | High |
| 2 | AUT | Austria | High | 32 | SWE | Sweden | High |
| 3 | BEL | Belgium | High | 33 | CHE | Switzerland | High |
| 4 | CAN | Canada | High | 34 | TUR | Turkey | Upper-middle |
| 5 | CHL | Chile | High | 35 | GBR | United Kingdom | High |
| 6 | CZE | Czech Republic | High | 36 | USA | United States | High |
| 7 | DNK | Denmark | High | 37 | ARG | Argentina | Upper-middle |
| 8 | EST | Estonia | High | 38 | BRA | Brazil | Upper-middle |
| 9 | FIN | Finland | High | 39 | BGR | Bulgaria | Upper-middle |
| 10 | FRA | France | High | 40 | CHN | China | Upper-middle |
| 11 | DEU | Germany | High | 41 | COL | Colombia | Upper-middle |
| 12 | GRC | Greece | High | 42 | CRI | Costa Rica | Upper-middle |
| 13 | HUN | Hungary | High | 43 | HRV | Croatia | High |
| 14 | ISL | Iceland | High | 44 | CYP | Cyprus | High |
| 15 | IRL | Ireland | High | 45 | IND | India | Low |
| 16 | ISR | Israel | High | 46 | IDN | Indonesia | Upper-middle |
| 17 | ITA | Italy | High | 47 | HKG | Hong Kong | High |
| 18 | JPN | Japan | High | 48 | MYS | Malaysia | Upper-middle |
| 19 | KOR | Korea | High | 49 | MLT | Malta | High |
| 20 | LVA | Latvia | High | 50 | MAR | Morocco | Lower-middle |
| 21 | LTU | Lithuania | High | 51 | PHL | Philippines | Lower-middle |
| 22 | LUX | Luxembourg | High | 52 | ROU | Romania | High |
| 23 | MEX | Mexico | Upper-middle | 53 | RUS | Russia | Upper-middle |
| 24 | NLD | Netherlands | High | 54 | SAU | Saudi Arabia | High |
| 25 | NZL | New Zealand | High | 55 | SGP | Singapore | High |
| 26 | NOR | Norway | High | 56 | ZAF | South Africa | Upper-middle |
| 27 | POL | Poland | High | 57 | TWN | Chinese Taipei | High |
| 28 | PRT | Portugal | High | 58 | THA | Thailand | Upper-middle |
| 29 | SVK | Slovakia | High | 59 | VNM | Viet Nam | Lower-middle |
| 30 | SVN | Slovenia | High | 60 | ROW | Rest of the World | Middle* |

*ROW aggregate includes several countries with different income levels, from low- to high-income, so we consider it a middle-income region on average.

*Source: Authors own elaboration based on AMNE database6 and World Bank9.*

**Table S3. List of sectors**

*Source: AMNE database6*

- 1. **CO2 Emissions Data**

Regarding global CO2 emissions, we use statistics on CO2 emissions provided by the International Energy Agency database10 until 2016, which offers data on CO2 emissions released in the combustion of fuel for 1960-2018, for 144 individual countries (and several aggregates), 32 emitter activities and 43 fuel types, in kilotons of CO2 (ktCO2). To reconcile this information into the industry and region classification of OECD-ICIO tables, we have created a CO2 emissions vector based on Wiebe et al.11 but considering additionally the two types of ownership following Duan et al.8. For the period 2017 to 2019IEA-AMNE fossil emissions are estimated following Global Carbon Budget emissions series12.

- 1. **Scenarios**

We have considered three scenarios based on total emissions targets in 2030 aligned with the Paris Agreement. Each scenario simulates the global emissions reduction if all the MNE subsidiaries set emissions reduction commitments to Shell's sentence levels (45% emissions reduction in 2030) under the three different allocation criteria: a) direct emissions; b) upstream emissions of final production and c) total upstream and downstream emissions. A summary of our estimates on MNEs emissions under each scenario is shown in Table S4:

**Table S4. Summary of MNE’s emission reductions scenarios**

| Scenario | Emissions accounting approach | MNE’s global responsibility (2019) | Share of global emissions | Potential emissions reduction by 2030 from the dissemination of Shell sentence | Share of global reductions needed not to exceed 2⁰C |
| --- | --- | --- | --- | --- | --- |
| **1** | Production-based accounting | 2.54 GtCO2 | 7.9% | 1.14 GtCO2 | 12%-18% |
| **2** | Producer footprint | 2.69 GtCO2 | 8.4% | 1.20 GtCO2 | 12%-19% |
| **3** | Extended carbon footprint | 6.14 GtCO2 | 19.1% | 2.76 GtCO2 | 28%-43% |

*Source: Authors own elaboration*

**References.**

1. Wang Y, Li J, Lee L-C, Wang M, Du H. A review of input–output model application hot spots in the energy and environment fields based on co-words network analysis. *Environmental Reviews* 2019, **27**(4)**:** 567-574.

2. López L-A, Cadarso M-Á, Zafrilla J, Arce G. The carbon footprint of the U.S. multinationals’ foreign affiliates. *Nature Communications* 2019, **10**(1)**:** 1672.

3. Zhang Z, Guan D, Wang R, Meng J, Zheng H, Zhu K*, et al.* Embodied carbon emissions in the supply chains of multinational enterprises. *Nature Climate Change* 2020, **10**(12)**:** 1096-1101.

4. Ortiz M, Cadarso M-Á, López L-A. The carbon footprint of foreign multinationals within the European Union. *Journal of Industrial Ecology* 2020, **24**(6)**:** 1287-1299.

5. Hertwich EG, Wood R. The growing importance of scope 3 greenhouse gas emissions from industry. *Environmental Research Letters* 2018, **13**(10)**:** 104013.

6. OECD. The Analytical AMNE database - Multinational enterprises and global value chains.; 2020.

7. Cadestin C DBK, Desnoyers-James I, Miroudot S, Rigo D, Ye M. Multinational enterprises and global value chains: the OECD analytical AMNE database. *OECD Trade Policy Papers* 2018, **211**.

8. Duan Y, Jiang X. Pollution haven or pollution halo? A Re-evaluation on the role of multinational enterprises in global CO2 emissions. *Energy Economics* 2021, **97:** 105181.

9. World Bank. World Bank Country and Lending Groups. 2021 [cited 8 June 2021]Available from: <https://datahelpdesk.worldbank.org/knowledgebase/articles/906519-world-bank-country-and-lending-groups>

10. IEA. CO2 emissions from fuel combustion: 2019 edition. In: Agency IE, editor.; 2019.

11. Wiebe K, Yamano N. *Estimating CO2 Emissions Embodied in Final Demand and Trade Using the OECD ICIO 2015*. OECD Publishing, 2016.

12. Global Carbon Budget. Data supplement to the Global Carbon Budget 2020 (version 1.0). In: Budget GC, editor.: Global Carbon Budget; 2020.
